# Supplementary material for: RNA-DNA hybrid (R-loop) immunoprecipitation mapping: an analytical workflow to evaluate inherent biases
Source: HighWire-hosted journal article supplement (doi:10.1101/gr.219394.116), 2017-03-24
Supplement: Supplemental_Table_S1.xlsx [file Supplemental_Table_S1.xlsx]

## Sheet: DRIP papers and conditions
Supplemental Table S1. List of publications using the DRIP method.
Study	Model organism / Cell type	Detection	Crosslink	Fragmentation	Cell Lysis	DNA extraction	Free RNA Removal	Reference cited
Alzu et al. 2012	Sc / W303	ChIP-qPCR	HCHO	sonication	-	Qiagen, Genomic DNA kit	-	Mischo et al. 2011
Bhatia et al. 2014	Hs / Hela	DRIP-qPCR	-	RE coctail	SDS/protK, 37 °C	Phe/Chl	-	Ginno et al. 2012
Boque-Sastre et al. 2015	Hs / SW480	DRIP-qPCR	-	RE coctail	SDS/protK, 37 °C	Phe/Chl	-	Ginno et al. 2012
Castellano-Pozo et al. 2013	Sc	DRIP-qPCR	HCHO	sonication	SDS	Phe/Chl	-	Mischo et al. 2011
Chan et al. 2014	Sc / BY4741	ChIP-Chip	HCHO	sonication	ChIP lysis -> SDS/protK	Phe/Chl	-	Ginno et al. 2012, Schulze et al. 2009
Chen et al. 2015	Mm / mESC	DRIP-RNA-seq	-	RE coctail	SDS/protK, 37 °C	Phe/Chl	-	Ginno et al. 2012
Cloutier et al. 2016	Sc	ChIP-qPCR	HCHO	sonication	ChIP lysis(PI)-> SDS/protK	Qiagene, PCR clean up kit	-	El Hage et al. 2010
El Hage et al. 2010	Sc / BY4741	ChIP-qPCR	HCHO	sonication	ChIP lysis -> SDS/protK	Qiagene, PCR clean up	-	El Hage et al. 2010
García-Rubio et al. 2015	Hs / NV012, HSC72, Hela, PD20; Mm /MEF	DRIP-qPCR	-	RE coctail	SDS/protK, 37 °C	Phe/Chl	-	Herrera-Moyano et al. 2014, Ginno et al. 2012
Ginno et al. 2012	Hs / Ntera2	DRIP-seq	-	RE coctail *	SDS/protK, 37 °C	Phe/Chl	-	Weber et al. 2005
Groh et al. 2014	Hs / HEK293	DRIP-qPCR	-	sonication	ChIP lysis -> SDS/protK	2-propanol, salting out extraction	-	Skourti-Stathaki et al. 2011
Hatchi et al. 2015	Hs / Hela, BJ-hTert	DRIP-qPCR	-	sonication	ChIP lysis -> protK, 55 °C	Phe/Chl	-	Skourti-Stathaki et al. 2011
Herrera-Moyano et al. 2014	Hs / Hela; Sc / W303	DRIP-qPCR	-	RE coctail	SDS/protK, 37 °C	Phe/Chl	RNaseA	Ginno et al. 2012
Jenjaroenpun et al. 2016	Hs / SKOV3	DRIP-qPCR	-	RE coctail	kit lysis buffer, 65 °C	Qiagen, Allprep kit	-	Ginno et al. 2012
Lim et al. 2015	Hs / primary fibroblast	DRIP-seq	-	RE coctail	SDS/protK, 37 °C	Phe/Chl	-	Ginno et al. 2012
Loomis et al. 2014	Hs / primary fibroblast	DRIP-qPCR	-	RE coctail	SDS/protK, 37 °C	Phe/Chl	-	Ginno et al. 2012
Marinello et al. 2016	Hs / Ntera2	DRIVE-qPCR	-	RE coctail	SDS/protK, 37 °C	Phe/Chl	-	Ginno et al. 2012
Mischo et al. 2011	Sc	DRIP-qPCR, ChIP-qPCR	HCHO	sonication	SDS	Phe/Chl	-	Liu et al. 2005
Nadel et al. 2015	Hs / HEK293T, IMR90	RDIP-seq	-	sonication	SDS/protK, 37 °C	2-propanol, salting out extraction	RNaseI	Ginno et al. 2012
Ohle et al. 2016	Sp	ChIP-exo seq	HCHO	sonication	ChIP lysis buffer	Phe/Chl	-	Rhee and Pugh 2012
Pefanis et al. 2015	Mm	DRIP-qPCR	-	RE coctail	SDS/protK, 37 °C	Phe/Chl	-	Ginno et al. 2012
Rigby et al. 2014	MMLV	DRIP-qPCR	-	-	SDS	Phe/Chl	-	-
Romanello et al. 2016	Gg / DT40	DRIP-qPCR	-	sonication	ChIP lysis -> SDS/protK, 55 °C	2-propanol, salting out extraction	-	Groh et al. 2014
Salvi et al. 2014	Sc	ChIP-qPCR	HCHO	sonication	ChIP lysis -> SDS	-	-	Chan et al. 2011
Sanz et al. 2016	Hs / Ntera2	DRIPc-seq	-	RE coctail *	SDS/protK, 37 °C	Phe/Chl	RNaseA	Ginno et al. 2012
Skourti-Stathaki et al. 2011	Hs / Hela	DRIP-qPCR	-	sonication	ChIP lysis ->protK, 55 °C	Phe/Chl	-	-
Stork et al. 2016	Hs / MCF7, MCF10A	DRIP-seq	-	RE coctail *	SDS/protK, 37 °C	Phe/Chl	-	Ginno et al. 2012
Sun et al. 2013	At / Col0	DRIP-qPCR	-	sonication	SDS/protK, 37 °C	Phe/Chl	-	Skourti-Stathaki et al. 2011, El Hage et al. 2010
Wahba et al. 2013	Sc	DRIP-qPCR	HCHO	sonication (after the kit)	kit lysis buffer, 65 °C	Qiagen, Genomic DNA kit	-	Mischo et al. 2011, Alzu et al. 2012
Wahba et al. 2016	Sc / S288c	S1-DRIP-seq	-	sonication***	kit lysis buffer, 50 °C	Qiagen, Genomic-tip 500/G	RNaseA	-
Yang et al. 2014	Hs / MCF7, Mm / MEF	DRIP-qPCR	-	RE coctail	SDS/protK, 37 °C	Phe/Chl	-	Ginno et al. 2012, Skourti-Stathaki et al. 2011
Yang et al. 2016	At / Col0	DRIP-qPCR	HCHO	sonication **	SDS/protK, 45 °C	Phe/Chl	-	Sun et al. 2013
Zhang et al. 2014	Mm / CH12F3.2a	DRIP-qPCR	-	RE (EcoRI)	SDS/protK, 37 °C	Phe/Chl	RNaseA	-
Zhang et al. 2014	Mm / CH12F3.2a	DRIP-qPCR	-	RE (EcoRI)	SDS/protK, 37 °C	Phe/Chl	RNaseA	-
Zhang et al. 2015	Mm / CH12F3.2a	DRIP-qPCR	-	RE (EcoRI)	SDS/protK, 37 °C	Phe/Chl	RNaseA	Zhang et al. 2014
Powell et al. 2013	Mm / NPC	DRIP-qPCR	-	RE coctail	SDS/protK, 37 °C	Phe/Chl	-	Ginno et al. 2012
Zeller et al. 2016	Ce	DRIP-qPCR / DRIP-seq	-	RE (AseI and BstUI)	kit lysis buffer, 50 °C	Qiagen, Genomic-tip 500/G	RNaseA	Ginno et al. 2012
* Before NGS library preparation the DRIP sample was further fragmented by sonication.
** Sonication was applied on chromatin prep, similarly to the standard ChIP protocol.
*** S1 nuclease digestion was applied before sonication.
Abbrevations
At = Arabidopsis thaliana
BJ-hTert = human immortalized fibroblast
CH12F3.2a = mouse lymphocyte
DT40 = Gallus gallus bursa lymphoma
Gg = Gallus gallus
Hela = cervix adenomcarcinoma
HEK293T = Human embryonic kidney cells
Hs = Homo sapiens
IMR90 = lung fibroblast
MCF7 = breast adenocarcinoma
Mm = Mus musculus
MMLV = Moloney Murine Leukemia Virus
Ntera2 = pluripotent human embryonal carcinoma cell line
Sc = Saccharomyces cerevisiae
SKOV3 = ovary cancer
Sp = Schizosaccharomyces pombe
SW480 = Human colon adenocarcinoma
Ce = Caenorhabditis elegans
