# Supplementary material for: RNA-DNA hybrid (R-loop) immunoprecipitation mapping: an analytical workflow to evaluate inherent biases
Source: HighWire-hosted journal article supplement (doi:10.1101/gr.219394.116), 2017-03-24
Supplement: Supplemental_Table_S2.xlsx [file Supplemental_Table_S2.xlsx]

## Sheet: ROC
Supplemental Table S2. ROC analysis results.
Reference	DRIP classifier	Temperature (oC)	AUC	lower_AUC_ci	upper_AUC_ci	threshold	specificity	sensitivity	accuracy	tn	tp	fn	fp	npv	ppv
DRIP-seq (this study)	exp 1	65	66.2	51	81.4	3.2	59.4	87	0.7	19	20	3	13	86.4	60.6
DRIP-seq (this study)	exp 1	37	74.9	60.6	89.2	1.1	75	75.9	0.8	18	22	7	6	72	78.6
DRIP-seq (this study)	exp 2	65	53.3	30.8	75.8	9.5	57.1	57.1	0.6	8	8	6	6	57.1	57.1
DRIP-seq (this study)	exp 2	37	65	49.3	80.7	0.8	52	81.5	0.7	13	22	5	12	72.2	64.7
DRIP-seq (this study)	exp 3	65	67.1	52.4	81.7	26.6	65.6	60.9	0.6	21	14	9	11	70	56
DRIP-seq (this study)	exp 3	37	73.5	57.2	89.8	1.4	75	75	0.8	15	15	5	5	75	75
DRIP-seq (this study)	exp 4	65	69.9	49.1	90.7	30	64.3	85.7	0.8	9	12	2	5	81.8	70.6
DRIP-seq (this study)	exp 4	37	58.2	40.9	75.4	50	73.9	50	0.6	17	12	12	6	58.6	66.7
DRIP-seq (this study)	exp 5	65	79.5	66.6	92.3	3.9	78.6	70	0.8	22	14	6	6	78.6	70
DRIP-seq (this study)	exp 5	37	83.9	70.2	97.5	1.4	90	77.3	0.8	18	17	5	2	78.3	89.5
DRIP-seq (this study)	exp 6	65	78.6	56.3	100	12	78.6	100	0.9	11	14	0	3	100	82.4
DRIP-seq (this study)	exp 6	37	70.6	53.8	87.5	1.3	71.4	70.8	0.7	15	17	7	6	68.2	73.9
DRIP-seq (this study)	exp 7	65	69.6	53.9	85.4	6.9	78.6	60	0.7	22	12	8	6	73.3	66.7
DRIP-seq (this study)	exp 7	37	75.1	59.3	90.9	1.5	90.5	68.2	0.8	19	15	7	2	73.1	88.2
DRIP-seq (this study)	exp 8	65	60.7	37.1	84.3	9.9	71.4	71.4	0.7	10	10	4	4	71.4	71.4
DRIP-seq (this study)	exp 8	37	62.7	44.5	80.8	2.7	78.9	57.1	0.7	15	12	9	4	62.5	75
DRIP-seq (this study)	exp 9	65	74.8	61.7	87.9	4.2	78.1	65.2	0.7	25	15	8	7	75.8	68.2
DRIP-seq (this study)	exp 9	37	82.2	70.3	94.2	1	66.7	91.3	0.8	16	21	2	8	88.9	72.4
DRIP-seq (this study)	exp 10	65	49.5	26.8	72.2	4.4	50	64.3	0.6	7	9	5	7	58.3	56.3
DRIP-seq (this study)	exp 10	37	63.4	46	80.8	3.3	59.1	75	0.7	13	15	5	9	72.2	62.5
DRIP-seq (this study)	exp 11	65	44.1	28.5	59.7	11.7	56.2	47.8	0.5	18	11	12	14	60	44
DRIP-seq (this study)	exp 11	37	65.5	48.8	82.2	3.5	59.1	77.3	0.7	13	17	5	9	72.2	65.4
DRIP-seq (this study)	exp 12	65	61.7	39.9	83.6	3.5	57.1	57.1	0.6	8	8	6	6	57.1	57.1
DRIP-seq (this study)	exp 12	37	37.3	20.9	53.7	12.8	62.5	50	0.6	15	12	12	9	55.6	57.1
DRIP-seq (this study)	exp 13	65	79.1	66.1	92.1	2	71.4	75	0.7	20	15	5	8	80	65.2
DRIP-seq (this study)	exp 13	37	79.2	65.8	92.5	2.3	95.5	62.5	0.8	21	15	9	1	70	93.8
DRIP-seq (this study)	exp 14	65	61.5	38.8	84.2	6.1	64.3	71.4	0.7	9	10	4	5	69.2	66.7
DRIP-seq (this study)	exp 14	37	73.1	55.6	90.6	1.1	70.8	95.8	0.8	17	23	1	7	94.4	76.7
DRIP-seq (this study)	exp 15	65	71.4	55.9	87	3.5	67.9	70	0.7	19	14	6	9	76	60.9
DRIP-seq (this study)	exp 15	37	69.1	52.9	85.2	3.1	88.5	54.5	0.7	23	12	10	3	69.7	80
DRIP-seq (this study)	exp 16	65	50.3	27.6	73	5.1	64.3	57.1	0.6	9	8	6	5	60	61.5
DRIP-seq (this study)	exp 16	37	52.2	34.1	70.3	4	68.2	56.5	0.6	15	13	10	7	60	65
DRIP-seq (this study)	exp 17	65	76.2	62.1	90.3	1.6	68	73.7	0.7	17	14	5	8	77.3	63.6
DRIP-seq (this study)	exp 18	65	74.7	54.1	95.2	2.5	83.3	66.7	0.8	10	8	4	2	71.4	80
DRIP-seq (this study)	exp 19	65	76.1	61.6	90.6	2	76	68.4	0.7	19	13	6	6	76	68.4
DRIP-seq (this study)	exp 20	65	60.1	33.6	86.6	1.1	83.3	58.3	0.7	10	7	5	2	66.7	77.8
DRIP-seq (this study)	exp 21	65	73.6	52.9	94.3	2.6	83.3	58.3	0.7	10	7	5	2	66.7	77.8
DRIP-seq (this study)	exp 22	65	67	44.1	89.9	2	83.3	50	0.7	10	6	6	2	62.5	75
DRIP-seq (this study)	exp 23	65	63.9	38.8	89	7.3	66.7	66.7	0.7	8	8	4	4	66.7	66.7
DRIP-seq (this study)	exp 24	65	70.8	48.1	93.6	1	66.7	75	0.7	8	9	3	4	72.7	69.2
Abbreviations:
AUC: area under the ROC curve
ci: confidence interval
tn: true negatives
tp: true positives
fn: false negative
fp: false positives
npv: negative predictive value
ppv: positive predective value
