# Supplementary material for: RNA-DNA hybrid (R-loop) immunoprecipitation mapping: an analytical workflow to evaluate inherent biases
Source: HighWire-hosted journal article supplement (doi:10.1101/gr.219394.116), 2017-03-24
Supplement: Supplemental_Table_S3.xlsx [file Supplemental_Table_S3.xlsx]

## Sheet: Primers
Supplemental Table S3. List of primers used for DRIP-qPCR.
ID	Region of interest	Forward	Reverse	Source
MYADM	chr19:54369611-54379682	CGTAGGTGCCCTAGTTGGAG	TCCATTCTCATTCCCAAACC	Loomis et al., 2014
FMR1	chrX:146992969-147032647	TTGCCCCTTAGTTCCCTGAG	TCTTCCATCAGTGCAGACCA	Loomis et al., 2015
APOE	chr19:45409039-45412649	CCGGTGAGAAGCGCAGTCGG	CCCAAGCCCGACCCCGAGTA	Bhatia et al., 2014
SNRPN	chr15:25068294-25223729	TGCCAGGAAGCCAAATGAGT	TCCCTCTTGGCAACATCCA	Bhatia et al., 2015
ZNF554	chr19:2819872-2836733	CGGGGAAAAGCCCTATAAAT	TCCACATTCACTGCATTCGT	Loomis et al., 2014
PRR5L	chr11:36331393-36331607	ACATCACCCATGATTATCCCGTTA	GACACAACAGGCTTCCAGGTC	This paper
LOC440704	chr1:190594020-190770787	TAACACACAGCCATTGGGAAA	TTTTGGTAAGAGGGTTAAGCAGTA	This paper
NOP58	chr2:203129707-203131386	ACGGCAATCTCTGCGGC	CCTAAACCCTCCACGCTGTA	This paper
VIM	chr10:17271648-17271966	CAGGACTCGGTGGACTTCTC	GGGCTTTGTCGTTGGTTAGC	This paper
ING3	chr7:120599507-120600206	TTTTTCTTCTCTAACTACCCTCCCC	GTGCCCTAATCTGAATGACTACA	This paper
